# Supplementary material
Source: PubMed Central journal article supplement (PMC6805087)
Supplement: AEM.01161-19-s0001.pdf [file AEM.01161-19-s0001.pdf]

# 1 Supplemental Materials

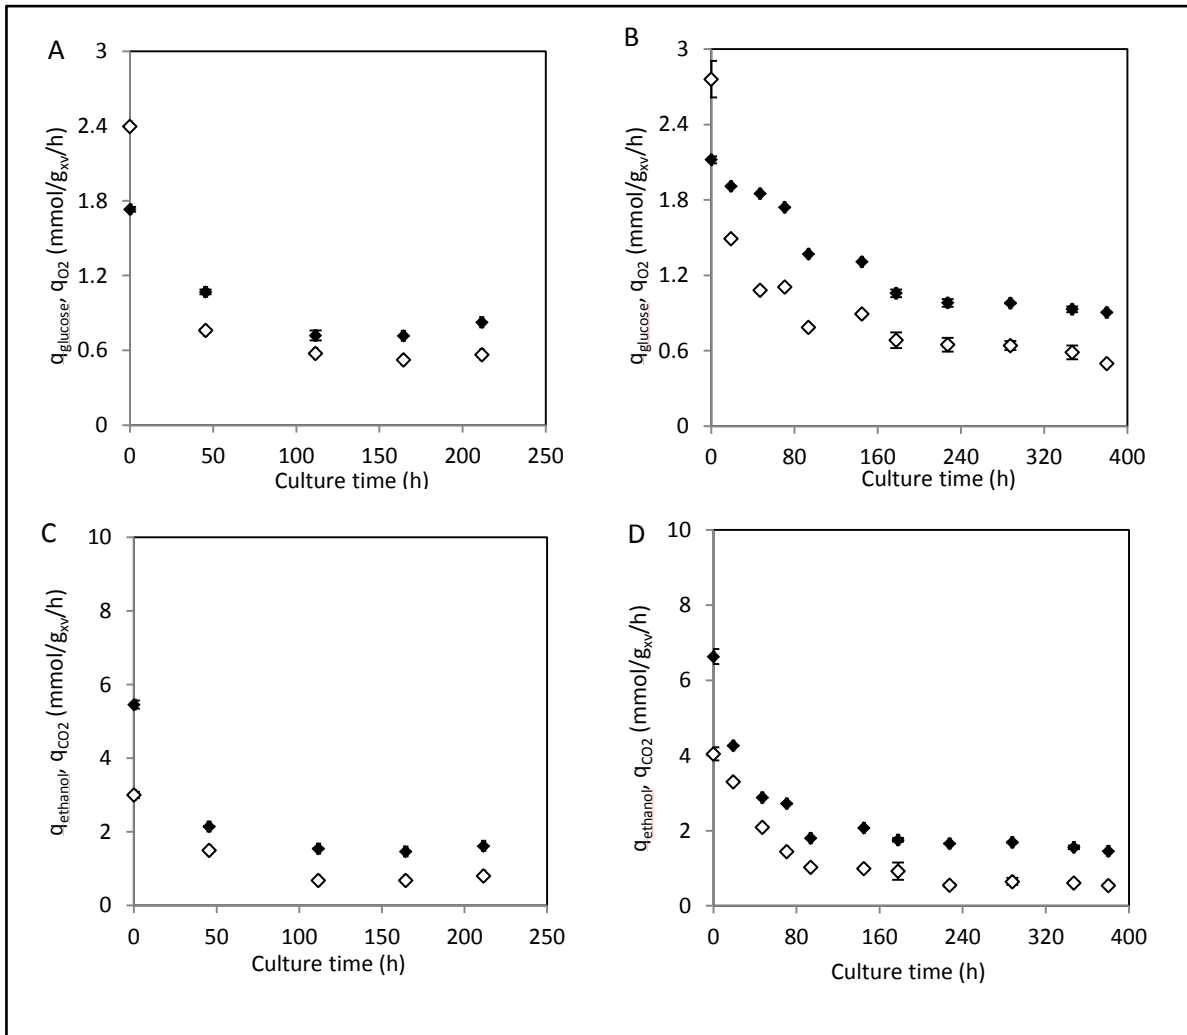

2

3 **Fig. S1** Biomass-specific consumption rates of glucose and oxygen and production rates of

4 ethanol and carbon dioxide in aerobic ammonium- and phosphate-limited retentostat

5 cultures of *S. cerevisiae* CEN.PK113-7D. Data represent the averages and standard errors of

6 measurements from duplicate retentostat cultures.

7 A, B: biomass-specific consumption rates of oxygen (closed symbols) and glucose (open

8 symbols) in ammonium-limited (A) and phosphate-limited (B) retentostat cultures.

9 C, D: biomass-specific production rates of carbon dioxide (closed symbols) and ethanol (open

10 symbols) in ammonium-limited (C) and phosphate-limited (D) retentostat cultures.

11

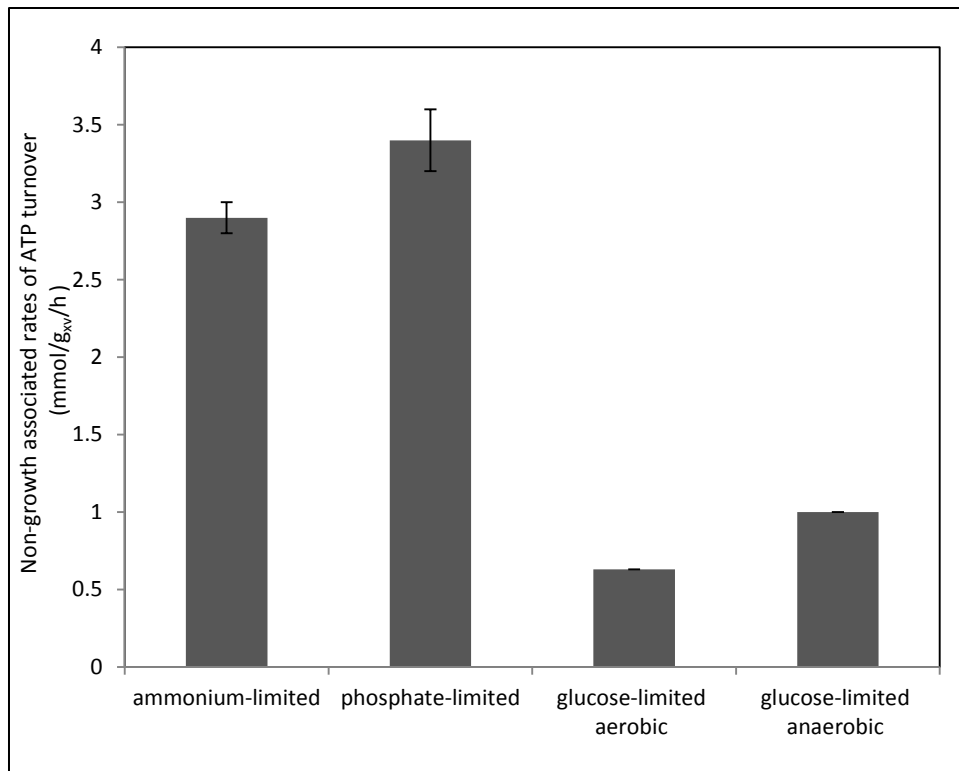

12

13 **Fig. S2** Non-growth associated rates of ATP turnover in retentostat cultures. Data from

14 glucose-limited aerobic and anaerobic cultures were obtained from previously published

15 work (1, 2). Data from this study represent the averages and standard errors of

16 measurements from duplicate cultures.

17

18

19

20

21

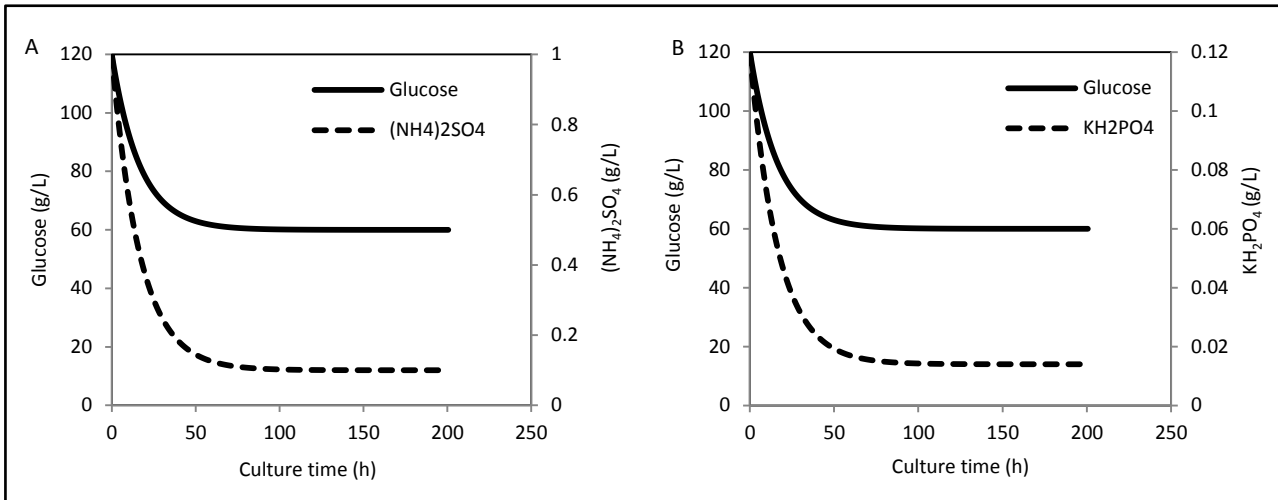

22

23 **Fig. S3** Gradual switch between chemostat and retentostat media during the start of the  
 24 retentostat cultivations, (A) feed concentrations of glucose and ammonium sulfate of the N-  
 25 limited retentostat cultures, (B) feed concentrations of glucose and potassium dihydrogen  
 26 phosphate of the P-limited retentostat cultures vs culture time in the retentostat.

27

28

29

30

31

32

33

34

35

36

37

38

39

40

41

42

43 **Table S1** Determination of the required concentrations of  $(\text{NH}_4)_2\text{SO}_4$  and  $\text{KH}_2\text{PO}_4$  in the feeds  
 44 of the N- and P-limited retentostats.

45

| total N released<br>from AAs <sup>a</sup><br>(mol/L) | total N released<br>from protein<br>(mol/L) | total N released rate<br>(mol/g <sub>xv</sub> /h) | total N compensation rate<br>(based on 5 g L <sup>-1</sup> biomass)<br>(mol/g <sub>xv</sub> /h) | $(\text{NH}_4)_2\text{SO}_4$<br>(g/L) |
|------------------------------------------------------|---------------------------------------------|---------------------------------------------------|-------------------------------------------------------------------------------------------------|---------------------------------------|
| 6.71E-03                                             | 5.71E-04                                    | 8.28E-06                                          | 4.14E-05                                                                                        | 0.10                                  |

46

| total P released<br>from metabolites <sup>b</sup><br>(mol/L) | total P released<br>rate<br>(mol/g <sub>xv</sub> /h) | total P compensation rate<br>(based on 5 g L <sup>-1</sup> biomass)<br>(mol/g <sub>xv</sub> /h) | $\text{KH}_2\text{PO}_4$<br>(g/L) |
|--------------------------------------------------------------|------------------------------------------------------|-------------------------------------------------------------------------------------------------|-----------------------------------|
| 4.57E-04                                                     | 5.19E-07                                             | 2.59E-06                                                                                        | 0.014                             |

47

48 *a*: Measured amino acids: Ala, Gly, Val, Leu, Ile, Pro, Ser, Thr, Met, Asp, Phe, Cys, Glu, Lys,  
 49 Asn, Gln, Tyr, His, Trp

50 *b*: Measured P-containing metabolites: FBP, PEP, G1P, 6PG, T6P, G3P, UDP-Glc, GAP, 2PG,  
 51 DHAP, 3PG, E4P, Rib5P, Ribu5P, Xyl5P, M6P, F6P, G6P, S7P, AMP, ADP, ATP, CoA, AcCoA

52

53

54

55

56

57

58

59

60

61

62

63

64

65 **Table S2** Measured viabilities in steady state chemostat and pronged retentostat cultures,  
 66 data present averages with their standard errors of results from duplicate experiments.

| culture condition     | culture time (h) | viability from CFU (%) | viability from CFDA staining (%) | viability from PI staining (%) |
|-----------------------|------------------|------------------------|----------------------------------|--------------------------------|
| N-limited chemostat   | 136              | 80 ± 7                 | 93 ± 2                           | 95 ± 1                         |
|                       | 184              | 87 ± 6                 | 90 ± 0                           | 93 ± 0                         |
|                       | 256              | 84 ± 2                 | 92 ± 2                           | 92 ± 0                         |
| N-limited retentostat | 0                | 82 ± 3                 | 92 ± 2                           | 92 ± 0                         |
|                       | 43               | 81 ± 1                 | 91 ± 2                           | 90 ± 0                         |
|                       | 70               | 79 ± 0                 | 85 ± 0                           | 88 ± 0                         |
|                       | 117              | 71 ± 5                 | 83 ± 1                           | 87 ± 0                         |
|                       | 170              | 66 ± 4                 | 81 ± 1                           | 84 ± 1                         |
|                       | 213              | 67 ± 5                 | 79 ± 1                           | 78 ± 2                         |
|                       |                  |                        |                                  | 67                             |
| P-limited chemostat   | 103              | 80 ± 27                | 92 ± 3                           | 93 ± 1                         |
|                       | 153              | 80 ± 7                 | 92 ± 4                           | 92 ± 0                         |
|                       | 201              | 75 ± 2                 | 87 ± 7                           | 90 ± 2                         |
| P-limited retentostat | 0                | 72 ± 12                | 89 ± 10                          | 90 ± 0                         |
|                       | 33               | 70 ± 30                | 89 ± 8                           | 88 ± 2                         |
|                       | 79               | 59 ± 11                | 84 ± 3                           | 86 ± 1                         |
|                       | 152              | 61 ± 11                | 83 ± 5                           | 84 ± 2                         |
|                       | 201              | 63 ± 25                | 80 ± 7                           | 83 ± 1                         |
|                       | 249              | 61 ± 0                 | 82 ± 4                           | 82 ± 1                         |
|                       | 321              | 61 ± 10                | 77 ± 5                           | 81 ± 1                         |
|                       | 354              | 62 ± 5                 | 76 ± 9                           | 85 ± 0                         |
|                       | 382              | 62 ± 8                 | 76 ± 12                          | 80 ± 0                         |
|                       |                  |                        | 70                               |                                |
|                       |                  |                        | 71                               |                                |
|                       |                  |                        | 72                               |                                |
|                       |                  |                        | 73                               |                                |
|                       |                  |                        | 74                               |                                |
|                       |                  |                        | 75                               |                                |

76

77

78

79

80

81

82 **Table S3** Input parameters for metabolic flux analysis (S3A) and obtained flux values with  
 83 their standard errors of central metabolism (S3B) for aerobic ammonium- and phosphate-  
 84 limited (N- and P- limited) steady-state, slow growth (SG) ( $\mu = 0.025 \text{ h}^{-1}$ ) chemostat cultures,  
 85 and pseudo-steady-state, near-zero growth (NZG) ( $\mu < 0.002 \text{ h}^{-1}$ ) retentostat cultures of *S.*  
 86 *cerevisiae* CEN.PK113-7D.

87 **Table S3A**

| Input parameters     | Unit                     | N-limited at SG                                                                                  | N-limited at NZG                                                                                  | P-limited at SG                                                                                  | P-limited at NZG                                                                                  |
|----------------------|--------------------------|--------------------------------------------------------------------------------------------------|---------------------------------------------------------------------------------------------------|--------------------------------------------------------------------------------------------------|---------------------------------------------------------------------------------------------------|
| $q_x$                | mmol/g <sub>xv</sub> /h  | 0.96 ± 0.09                                                                                      | 0.022 ± 0.003                                                                                     | 0.99 ± 0.04                                                                                      | 0.017 ± 0.003                                                                                     |
| $q_{\text{CO}_2}$    | mmol/g <sub>xv</sub> /h  | 5.5 ± 0.2                                                                                        | 1.5 ± 0.0                                                                                         | 6.6 ± 0.3                                                                                        | 1.6 ± 0.1                                                                                         |
| $q_{\text{ethanol}}$ | mmol/g <sub>xv</sub> /h  | 3.1 ± 0.1                                                                                        | 0.75 ± 0.00                                                                                       | 4.0 ± 0.2                                                                                        | 0.55 ± 0.05                                                                                       |
| $q_{\text{glucose}}$ | mmol/g <sub>xv</sub> /h  | 2.3 ± 0.0                                                                                        | 0.57 ± 0.01                                                                                       | 2.7 ± 0.2                                                                                        | 0.53 ± 0.01                                                                                       |
| $q_{\text{O}_2}$     | mmol/g <sub>xv</sub> /h  | 1.7 ± 0.0                                                                                        | 0.71 ± 0.03                                                                                       | 2.1 ± 0.0                                                                                        | 0.94 ± 0.02                                                                                       |
| $\mu$                | h <sup>-1</sup>          | 0.025<br>± 0.002                                                                                 | 0.00054<br>± 0.00006                                                                              | 0.028<br>± 0.003                                                                                 | 0.00042<br>± 0.0008                                                                               |
| biomass protein      | %<br>(g/[100 g biomass]) | 12.6<br>± 0.2                                                                                    | 9.6<br>± 0.4                                                                                      | 32.3<br>± 1.7                                                                                    | 26.3<br>± 2.1                                                                                     |
| Mw                   | g/mol                    | 25.6 ± 0.0                                                                                       | 24.3 ± 0.3                                                                                        | 27.3 ± 0.2                                                                                       | 25.4 ± 0.1                                                                                        |
| C molar formulas     |                          | CH <sub>1.8</sub> O <sub>0.63</sub> N <sub>0.063</sub><br>P <sub>0.011</sub> S <sub>0.0013</sub> | CH <sub>1.8</sub> O <sub>0.60</sub> N <sub>0.042</sub><br>P <sub>0.0082</sub> S <sub>0.0009</sub> | CH <sub>1.9</sub> O <sub>0.63</sub> N <sub>0.10</sub><br>P <sub>0.0044</sub> S <sub>0.0034</sub> | CH <sub>1.8</sub> O <sub>0.59</sub> N <sub>0.083</sub><br>P <sub>0.0023</sub> S <sub>0.0022</sub> |

88

89

90

91

92

93

94

| Metabolic Reaction                                   | Enzyme                                 | N-limited at SG         | P-limited at SG         | N-limited at NZG        | P-limited at NZG        |
|------------------------------------------------------|----------------------------------------|-------------------------|-------------------------|-------------------------|-------------------------|
|                                                      |                                        | mmol/g <sub>xv</sub> /h | mmol/g <sub>xv</sub> /h | mmol/g <sub>xv</sub> /h | mmol/g <sub>xv</sub> /h |
| <b>Glycolysis</b>                                    |                                        |                         |                         |                         |                         |
| Glucose→G6P                                          | hexokinase                             | 2.28 ± 0.04             | 2.67 ± 0.04             | 0.50 ± 0.01             | 0.48 ± 0.00             |
| G6P→F6P                                              | G6P isomerase                          | 2.12 ± 0.03             | 2.51 ± 0.04             | 0.50 ± 0.01             | 0.48 ± 0.00             |
| F6P→F16BP                                            | phosphofructokinase                    | 2.15 ± 0.03             | 2.54 ± 0.04             | 0.50 ± 0.01             | 0.48 ± 0.00             |
| F16BP→DHAP+GAP                                       | fructosebisphosphate aldolase          | 2.15 ± 0.03             | 2.54 ± 0.04             | 0.50 ± 0.01             | 0.48 ± 0.00             |
| DHAP→GAP                                             | triosephosphate isomerase              | 2.15 ± 0.03             | 2.54 ± 0.04             | 0.50 ± 0.01             | 0.48 ± 0.00             |
| GAP→13BPG                                            | glyceraldehyde phosphate dehydrogenase | 4.31 ± 0.06             | 5.09 ± 0.08             | 0.99 ± 0.01             | 0.96 ± 0.01             |
| 13BPG→3PG                                            | phosphoglycerate kinase                | 4.31 ± 0.06             | 5.09 ± 0.08             | 0.99 ± 0.01             | 0.96 ± 0.01             |
| 3PG→2PG                                              | phosphoglycerate mutase                | 4.30 ± 0.06             | 5.08 ± 0.08             | 0.99 ± 0.01             | 0.96 ± 0.01             |
| 2PG→PEP                                              | enolase                                | 4.30 ± 0.06             | 5.08 ± 0.08             | 0.99 ± 0.01             | 0.96 ± 0.01             |
| PEP→PYR                                              | pyruvate kinase                        | 4.30 ± 0.06             | 5.07 ± 0.08             | 0.99 ± 0.01             | 0.96 ± 0.01             |
| <b>PP-pathway</b>                                    |                                        |                         |                         |                         |                         |
| G6P→6PG                                              | G6P dehydrogenase                      | 0.05 ± 0.00             | 0.05 ± 0.00             | 0.0012 ± 0.0001         | 0.0009 ± 0.0002         |
| 6PG→RIBU5P                                           | 6-phosphogluconate dehydrogenase       | 0.05 ± 0.00             | 0.05 ± 0.00             | 0.0012 ± 0.0001         | 0.0009 ± 0.0002         |
| RIBU5P→RIB5P                                         | ribosephosphate isomerase              | 0.02 ± 0.00             | 0.02 ± 0.00             | 0.0004 ± 0.0000         | 0.0003 ± 0.0001         |
| RIBU5P→XYL5P                                         | ribulosephosphate epimerase            | 0.03 ± 0.00             | 0.03 ± 0.00             | 0.0007 ± 0.0001         | 0.0005 ± 0.0001         |
| RIB5P+XYL5P→GAP+SED7P                                | transketolase 1                        | 0.02 ± 0.00             | 0.02 ± 0.00             | 0.0004 ± 0.0000         | 0.0003 ± 0.0001         |
| GAP+SED7P→E4P+S6P                                    | transaldolase                          | 0.02 ± 0.00             | 0.02 ± 0.00             | 0.0004 ± 0.0000         | 0.0003 ± 0.0001         |
| RIB5P+XYL5P→GAP+SED7P                                | transketolase 2                        | 0.01 ± 0.00             | 0.02 ± 0.00             | 0.0003 ± 0.0000         | 0.0002 ± 0.0000         |
| <b>TCA-cycle</b>                                     |                                        |                         |                         |                         |                         |
| ACCOA+OAA→COA+CIT                                    | citrate synthase mitochondrial         | 0.59 ± 0.01             | 0.66 ± 0.06             | 0.27 ± 0.01             | 0.35 ± 0.02             |
| CIT→ISOCIT                                           | aconitase 1,2                          | 0.59 ± 0.01             | 0.66 ± 0.06             | 0.27 ± 0.01             | 0.35 ± 0.02             |
| ICIT→AKG                                             | isocitrate dehydrogenase (NAD)         | 0.58 ± 0.01             | 0.65 ± 0.06             | 0.27 ± 0.01             | 0.35 ± 0.02             |
| ICIT→AKG                                             | isocitrate dehydrogenase (NADP)        | 0.01 ± 0.00             | 0.01 ± 0.00             | 0.0002 ± 0.0000         | 0.0001 ± 0.0000         |
| AKG→SUCCOA                                           | a-ketoglutarate dehydrogenase          | 0.58 ± 0.01             | 0.65 ± 0.06             | 0.27 ± 0.01             | 0.35 ± 0.02             |
| SUCCOA→SUC                                           | succinylcoa synthetase                 | 0.58 ± 0.01             | 0.65 ± 0.06             | 0.27 ± 0.01             | 0.35 ± 0.02             |
| SUC→FUM                                              | succinate dehydrogenase                | 0.58 ± 0.01             | 0.65 ± 0.06             | 0.27 ± 0.01             | 0.35 ± 0.02             |
| FUM→MAL                                              | fumarate hydratase                     | 0.58 ± 0.01             | 0.65 ± 0.06             | 0.27 ± 0.01             | 0.35 ± 0.02             |
| FUM→MAL                                              | fumarate hydratase cytosolic           | 0.01 ± 0.00             | 0.01 ± 0.00             | 0.0001 ± 0.0000         | 0.0001 ± 0.0000         |
| MAL→OAA                                              | malate dehydrogenase                   | 0.59 ± 0.01             | 0.66 ± 0.06             | 0.27 ± 0.01             | 0.35 ± 0.02             |
| <b>Pyruvate branchpoint</b>                          |                                        |                         |                         |                         |                         |
| PYR→ACT                                              | pyruvate decarboxylase                 | 3.67 ± 0.07             | 4.21 ± 0.20             | 0.73 ± 0.00             | 0.61 ± 0.01             |
| PYR→ACCOA                                            | pyruvate dehydrogenase                 | 0.59 ± 0.01             | 0.66 ± 0.06             | 0.27 ± 0.01             | 0.35 ± 0.02             |
| PYR→OAA                                              | pyruvate carboxylase                   | 0.02 ± 0.00             | 0.02 ± 0.00             | 0.0004 ± 0.0000         | 0.0003 ± 0.0001         |
| ACT→ETOH                                             | alcohol dehydrogenase                  | 3.61 ± 0.06             | 4.14 ± 0.20             | 0.72 ± 0.00             | 0.61 ± 0.01             |
| ACT→ACCOA                                            | acetyl-CoA synthase                    | 0.06 ± 0.00             | 0.06 ± 0.00             | 0.001 ± 0.000           | 0.001 ± 0.000           |
| ACCOA→COA                                            | acetylcoa carboxylase cyt              | 0.05 ± 0.00             | 0.05 ± 0.00             | 0.001 ± 0.000           | 0.001 ± 0.000           |
| <b>Non-growthed associated rates of ATP turnover</b> |                                        |                         |                         |                         |                         |
| ATP→ADP                                              |                                        | 8.4 ± 0.4               | 10.9 ± 0.5              | 2.9 ± 0.1               | 3.4 ± 0.2               |

98 **Table S4** Extracellular amino acids concentration in aerobic ammonium-limited (N-limited)  
 99 steady-state, slow growth (SG) ( $\mu = 0.025 \text{ h}^{-1}$ ) chemostat cultures, and pseudo-steady-state,  
 100 near-zero growth (NZG) ( $\mu < 0.002 \text{ h}^{-1}$ ) retentostat cultures of *S. cerevisiae* CEN.PK113-7D.  
 101 Data represent the averages and standard errors of multiple measurements from duplicate  
 102 cultures.

|      | N-limited at SG | N-limited at NZG | Km from literature |
|------|-----------------|------------------|--------------------|
|      | $\mu\text{M}$   | $\mu\text{M}$    | $\mu\text{M}$      |
| Ala  | 17.9 ± 4.4      | 6.9 ± 1.3        | 37(3)              |
| Gly  | 0.90 ± 0.25     | 0.46 ± 0.02      | ~ <sup>a</sup>     |
| Val  | 2.0 ± 0.3       | 0.81 ± 0.06      | 37(3)              |
| Leu  | 0.47 ± 0.05     | 1.2 ± 0.3        | 37(3, 4)           |
| Ile  | 0.31 ± 0.05     | 0.59 ± 0.19      | 37(3)              |
| Pro  | 0.17 ± 0.03     | 0.10 ± 0.04      | 34(5, 6)           |
| Ser  | 1.1 ± 0.1       | 1.2 ± 0.2        | 590(3)             |
| Thr  | 0.72 ± 0.09     | 0.57 ± 0.02      | 590(3)             |
| Meth | ~ <sup>b</sup>  | ~ <sup>b</sup>   | 13(7)              |
| Asp  | 1.0 ± 0.1       | 1.0 ± 0.0        | 56(3)              |
| Phe  | 0.38 ± 0.03     | 0.92 ± 0.31      | 24(8)              |
| Cys  | 25.9 ± 3.9      | 4.4 ± 0.6        | 37, 55(3, 9)       |
| Glu  | 8.8 ± 0.8       | 4.2 ± 0.5        | 48(3)              |
| Lys  | 33.7 ± 2.2      | 0.52 ± 0.17      | 10-25(3, 10)       |
| Asn  | ~ <sup>c</sup>  | 3.5 ± 0.0        | 590(3)             |
| Gln  | 4.1 ± 0.6       | 6.0 ± 0.3        | 590(3, 11)         |
| Tyr  | ~ <sup>d</sup>  | ~ <sup>d</sup>   | 160(12)            |
| His  | ~ <sup>e</sup>  | 0.11 ± 0.06      | 10-20(3, 13)       |
| Trp  | ~ <sup>f</sup>  | ~ <sup>f</sup>   | 42(14)             |

103

104 *a*: did not find in literature

105 *b*: Meth was below the detection limit of assay: 0.03  $\mu\text{M}$

106 *c*: Asn was below the detection limit of assay: 0.125  $\mu\text{M}$

107 *d*: Tyr was below the detection limit of assay: 0.03  $\mu\text{M}$



108 e: His was below the detection limit of assay: 0.12  $\mu$ M

109 f: Trp was below the detection limit of assay: 0.025  $\mu$ M

110

111

112

113

114

115

116

117

118

119

120

121

122

123

124

125

126

127

128

129

130

131 **Table S5** Comparison of respiratory quotients (RQ) of aerobic ammonium- and phosphate-  
132 limited steady state, slow growth (SG) ( $\mu = 0.025 \text{ h}^{-1}$ ) chemostat cultures and pseudo-steady-  
133 state, near-zero growth (NZG) ( $\mu < 0.002 \text{ h}^{-1}$ ) retentostat cultures of *S. cerevisiae* CEN.PK113-  
134 7D. Data from this study represent averages with standard errors of measurements from  
135 duplicate cultures.

| $\mu$<br>( $\text{h}^{-1}$ ) | RQ               |                   | Reference         |
|------------------------------|------------------|-------------------|-------------------|
|                              | ammonium-limited | phosphate-limited |                   |
| 0.1                          | $4.5 \pm 0.2$    | $3.4 \pm 0.0$     | Boer's study (15) |
| 0.025                        | $3.1 \pm 0.0$    | $3.1 \pm 0.1$     | This study        |
| $< 0.002$                    | $2.1 \pm 0.1$    | $1.7 \pm 0.0$     | This study        |

136  
137  
138  
139  
140  
141  
142  
143  
144  
145  
146  
147  
148  
149  
150  
151  
152  
153  
154  
155

156 **Table S6** Nitrogen balance of N-limited retentostats at near-zero specific growth rates

| N balance based on "Total N" |                   | N balance based on "AAs and protein" |                   |
|------------------------------|-------------------|--------------------------------------|-------------------|
| $qn_{in}$ (mgN/gX/h)         | $0.057 \pm 0.009$ | $qn_{in}$ (mgN/gX/h)                 | $0.057 \pm 0.009$ |
| $qn_{out}$ (mgN/gX/h)        | $0.033 \pm 0.000$ | $qn_{AAs}$ (mgN/gX/h)                | $0.008 \pm 0.004$ |
|                              |                   | $qn_{protein}$ (mgN/gX/h)            | $0.031 \pm 0.006$ |
| $qn_x$ (mgN/gX/h)            | $0.022 \pm 0.007$ | $qn_x$ (mgN/gX/h)                    | $0.022 \pm 0.007$ |
| N recovery (%)               | $98 \pm 3$        | N recovery (%)                       | $102 \pm 1$       |

157

158

159

160

161

162

163

164

165

166

167

168

169

170

171

172

173

174

175

176

177

178

179

180 **Reference**

- 181 1. Vos T, Hakkaart XD, de Hulster EA, van Maris AJ, Pronk JT, Daran-Lapujade P. 2016.  
182 Maintenance-energy requirements and robustness of *Saccharomyces cerevisiae* at  
183 aerobic near-zero specific growth rates. *Microb Cell Fact* 15:111.
- 184 2. Boender LG, de Hulster EA, van Maris AJ, Daran-Lapujade PA, Pronk JT. 2009.  
185 Quantitative physiology of *Saccharomyces cerevisiae* at near-zero specific growth  
186 rates. *Appl Environ Microbiol* 75:5607-5614.
- 187 3. Ruiz SJ, van 't Klooster JS, Bianchi F, Poolman B. 2017. Growth inhibition by amino  
188 acids in *Saccharomyces cerevisiae*. *bioRxiv*.
- 189 4. Schreve J, Garrett JM. 1997. The Branched-Chain Amino Acid Permease Gene of  
190 *Saccharomyces cerevisiae*, BAP2, Encodes the High-Affinity Leucine Permease (S1).  
191 *Yeast* 13:435-439.
- 192 5. Gournas C, Evangelidis T, Athanasopoulos A, Mikros E, Sophianopoulou V. 2015. The  
193 *Aspergillus nidulans* proline permease as a model for understanding the factors  
194 determining substrate binding and specificity of fungal amino acid transporters. *J Biol*  
195 *Chem* 290:6141-6155.
- 196 6. Tavoularis SN, Tazebay UH, Diallinas G, Sideridou M, Rosa A, Scazzocchio C,  
197 Sophianopoulou V. 2003. Mutational analysis of the major proline transporter (PrnB)  
198 of *Aspergillus nidulans*. *Mol Membr Biol* 20:285-97.
- 199 7. Isnard A-D, Thomas D, Surdin-Kerjan Y. 1996. The Study of Methionine Uptake in  
200 *Saccharomyces cerevisiae* Reveals a New Family of Amino Acid Permeases. *J Mol Biol*  
201 262:473-484.
- 202 8. Sáenz DA, Chianelli MS, Stella CA. 2014. L-Phenylalanine Transport in *Saccharomyces*  
203 *cerevisiae*: Participation of GAP1, BAP2, and AGP1. *J Amino Acids* 2014:9.

- 204 9. Kaur J, Bachhawat AK. 2007. Yct1p, a novel, high-affinity, cysteine-specific  
205 transporter from the yeast *Saccharomyces cerevisiae*. *Genetics* 176:877-90.
- 206 10. Ghaddar K, Krammer EM, Mihajlovic N, Brohee S, Andre B, Prevost M. 2014.  
207 Converting the yeast arginine can1 permease to a lysine permease. *J Biol Chem*  
208 289:7232-46.
- 209 11. Zhu X, Garrett J, Schreve J, Michaeli T. 1996. GNP1, the high-affinity glutamine  
210 permease of *S. cerevisiae*. *Curr Genet* 30:107-114.
- 211 12. Omura F, Hatanaka H, Nakao Y. 2007. Characterization of a novel tyrosine permease  
212 of lager brewing yeast shared by *Saccharomyces cerevisiae* strain RM11-1a. *FEMS*  
213 *Yeast Res* 7:1350-61.
- 214 13. Bajmoczy M, Sneve M, Eide DJ, Drewes LR. 1998. TAT1 Encodes a Low-Affinity  
215 Histidine Transporter in *Saccharomyces cerevisiae*. *Mol Cell Biol Res Commun*  
216 243:205–209.
- 217 14. Trip H, Evers ME, Driessen AJ. 2004. PcMtr, an aromatic and neutral aliphatic amino  
218 acid permease of *Penicillium chrysogenum*. *Biochim Biophys Acta* 1667:167-73.
- 219 15. Boer VM, de Winde JH, Pronk JT, Piper MD. 2003. The genome-wide transcriptional  
220 responses of *Saccharomyces cerevisiae* grown on glucose in aerobic chemostat  
221 cultures limited for carbon, nitrogen, phosphorus, or sulfur. *J Biol Chem* 278:3265-  
222 3274.

223
